# Supplementary material for: Cytoplasmic Determination of Meiotic Spindle Size Revealed by a Unique Inter-Species Germinal Vesicle Transfer Model
Source: PubMed Central journal article supplement (PMC4728387; doi:10.1038/srep19827), 2016-01-27
Supplement: srep19827-s5.pdf [file srep19827-s5.pdf]

**Cytoplasmic Determination of Meiotic Spindle Size Revealed by a Unique Inter-Species Germinal Vesicle Transfer Model**

Zhong-Wei Wang<sup>1</sup>, Guang-Li Zhang<sup>1</sup>, Heide Schatten<sup>2</sup>, John Carroll<sup>3</sup>, Qing-Yuan

Sun<sup>1\*</sup>

<sup>1</sup>State Key Laboratory of Reproductive Biology, Institute of Zoology, Chinese Academy of Sciences, Beijing 100101, China

<sup>2</sup>Department of Veterinary Pathobiology, University of Missouri, Columbia, MO 65211, USA

<sup>3</sup>Faculty of Medicine, Nursing and Health Sciences, Monash University, Clayton Campus, 3800, Australia

\*Corresponding author

**Supplementary file 1. A slit was made in the mouse oocyte zona pellucida**

**Supplementary file 2. Mouse GV was removed by a blunt-tip micropipette**

**Supplementary file 3. Pig GV was squeezed out from the slit of the zona pellucida**

**Supplementary file 4. Mouse GV was injected to the pig cytoplasm by a piezo-actuated micromanipulator**
